# Supplementary material for: Synthesis and characterization of bio-based transesterification catalysts for green 3D-printable dynamic photopolymers
Source: Royal Society of Chemistry journal article supplement (doi:10.1039/d3py00989k), 2023-01-01
Supplement: d3py00989k1.pdf [file d3py00989k1.pdf]

## Synthesis and Characterization of Bio-Based Transesterification Catalysts for Green 3D-Printable Dynamic Photopolymers

Bernhard Sölle,<sup>†</sup> Usman Shaukat,<sup>†</sup> Elisabeth Rossegger,<sup>\*</sup> and Sandra Schlögl<sup>\*</sup>

Polymer Competence Center Leoben GmbH, Sauraugasse 1, 8700 Leoben, Austria

E-mail: sandra.schloegl@pccl.at or elisabeth.rossegger@pccl.at

### 1. NMR-spectra of the synthesized compounds

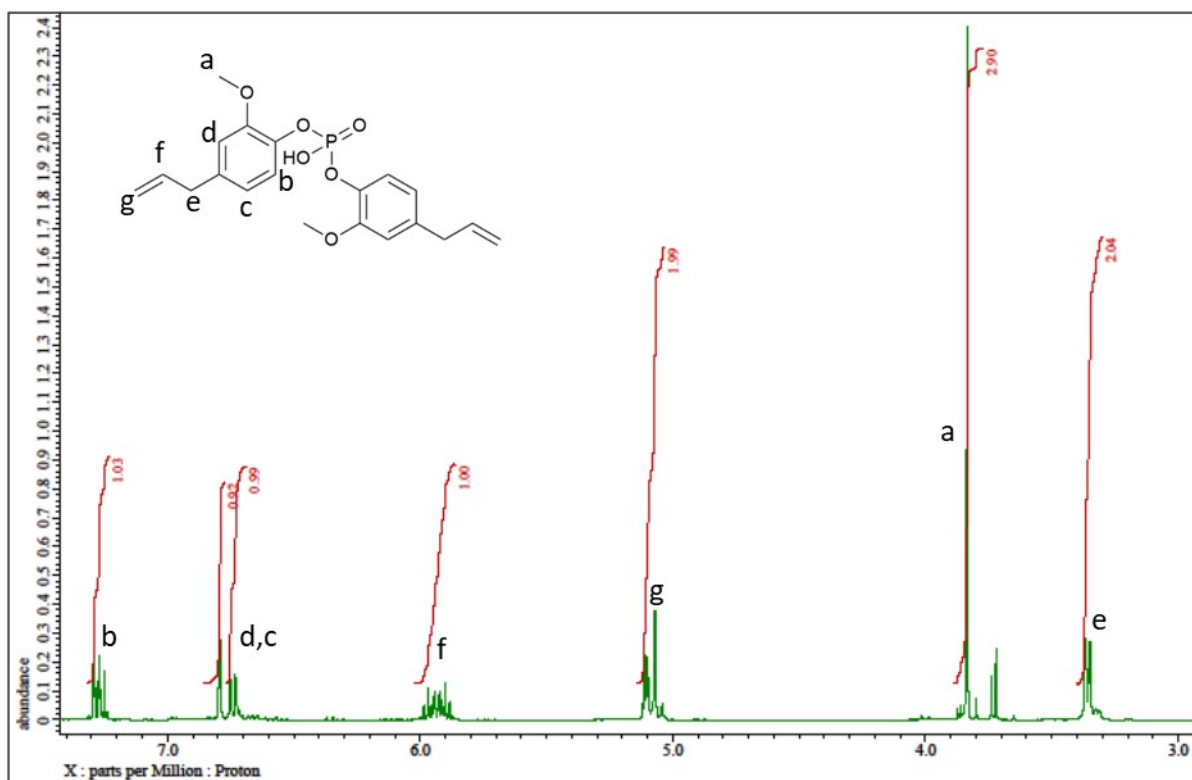

Figure S1: <sup>1</sup>H NMR spectrum of EUGP

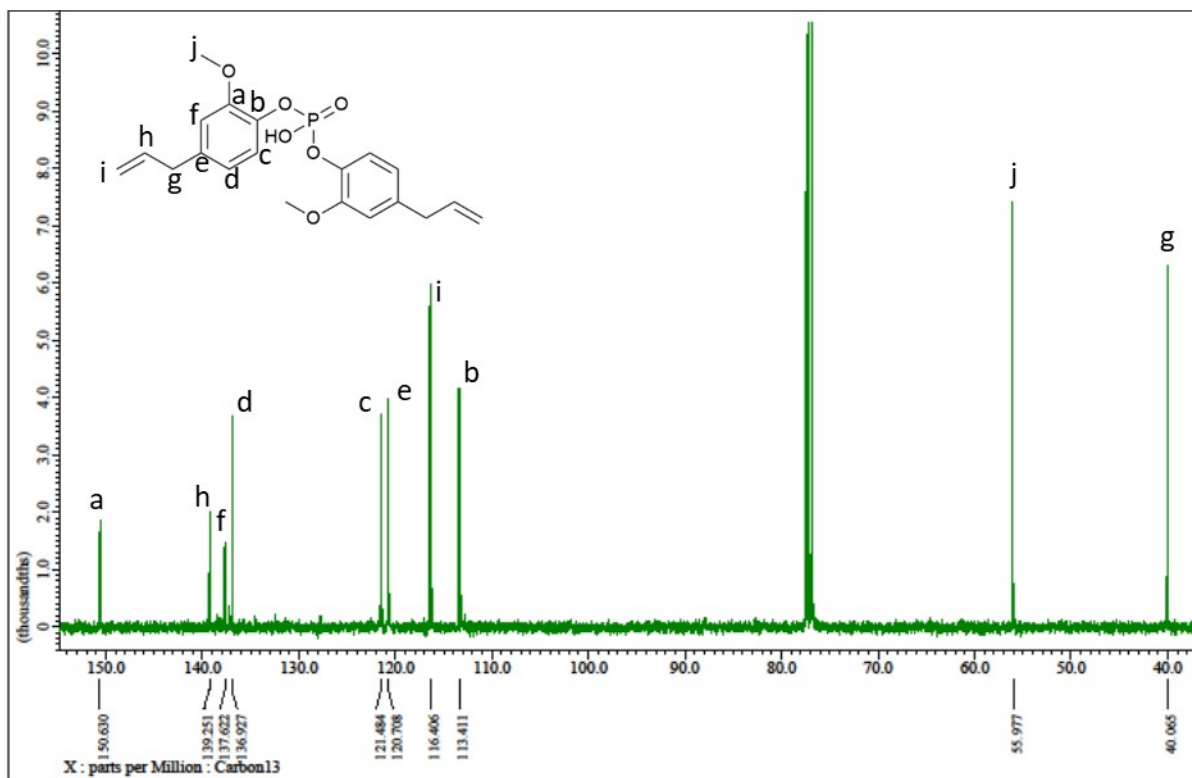

Figure S2:  $^{13}\text{C}$  NMR spectrum of EUGP

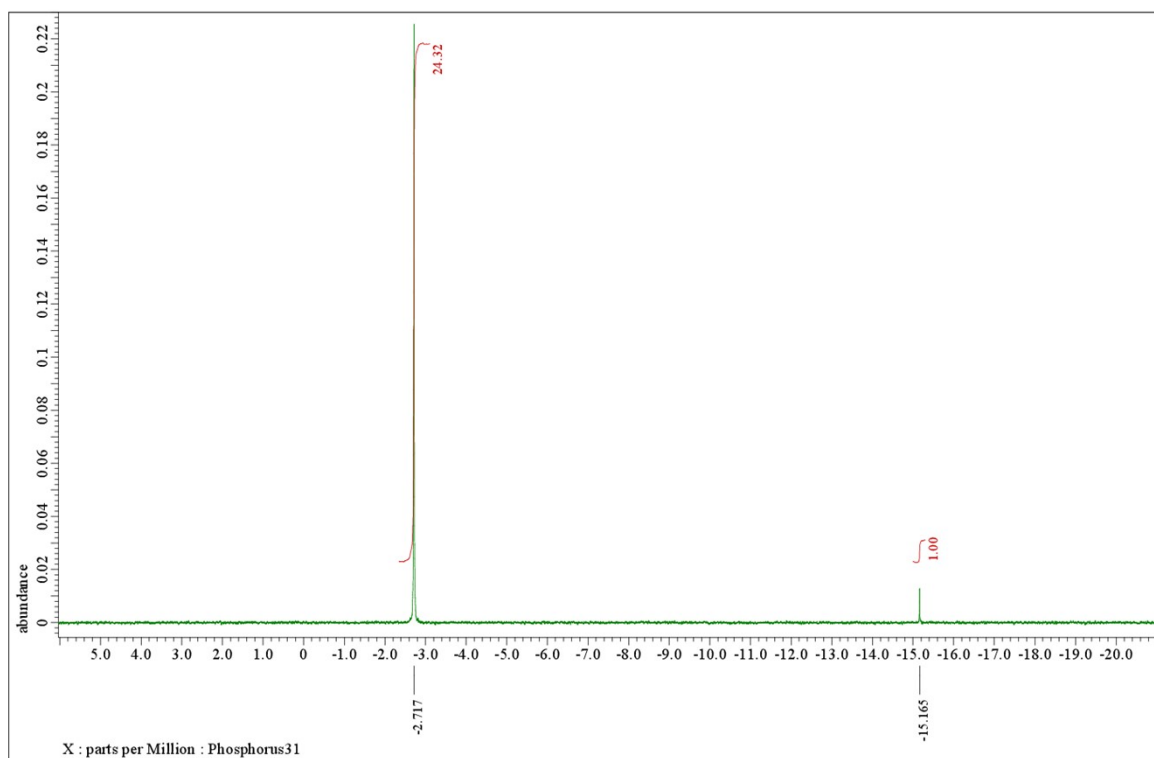

Figure S3:  $^{31}\text{P}$  NMR spectrum of EUGP

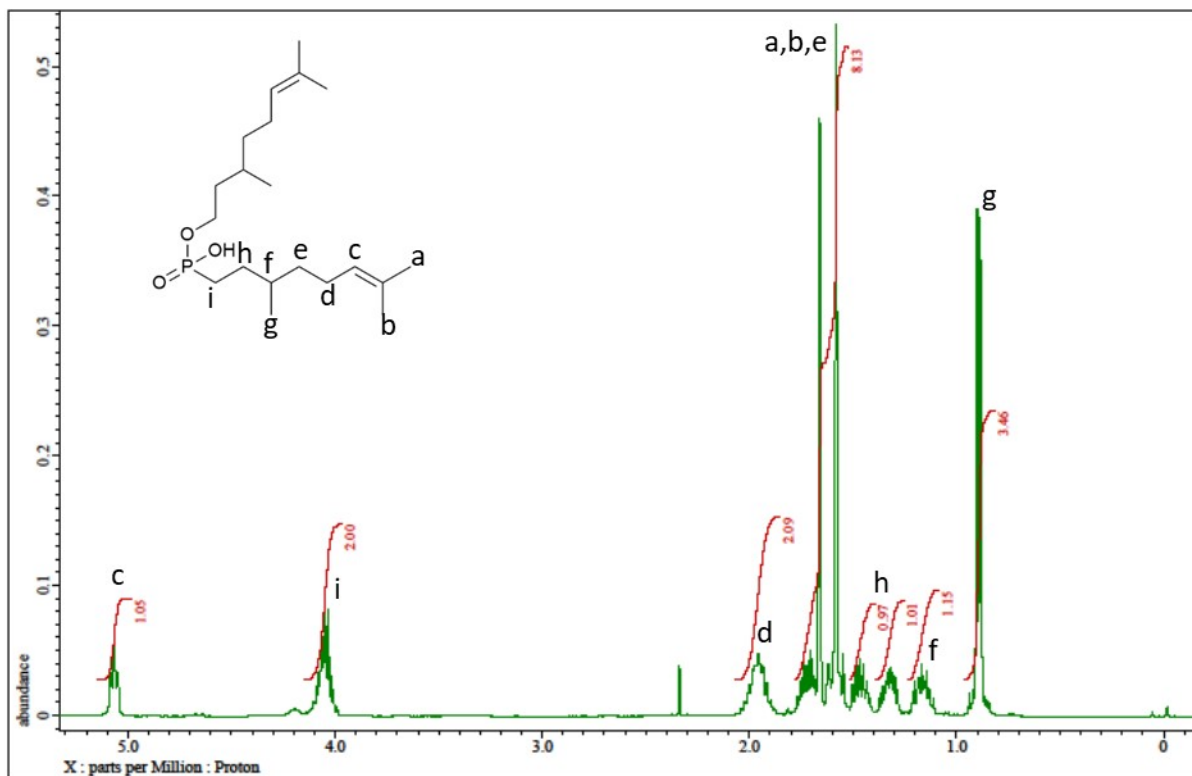

Figure S4:  $^1\text{H}$  NMR spectrum of CitrP

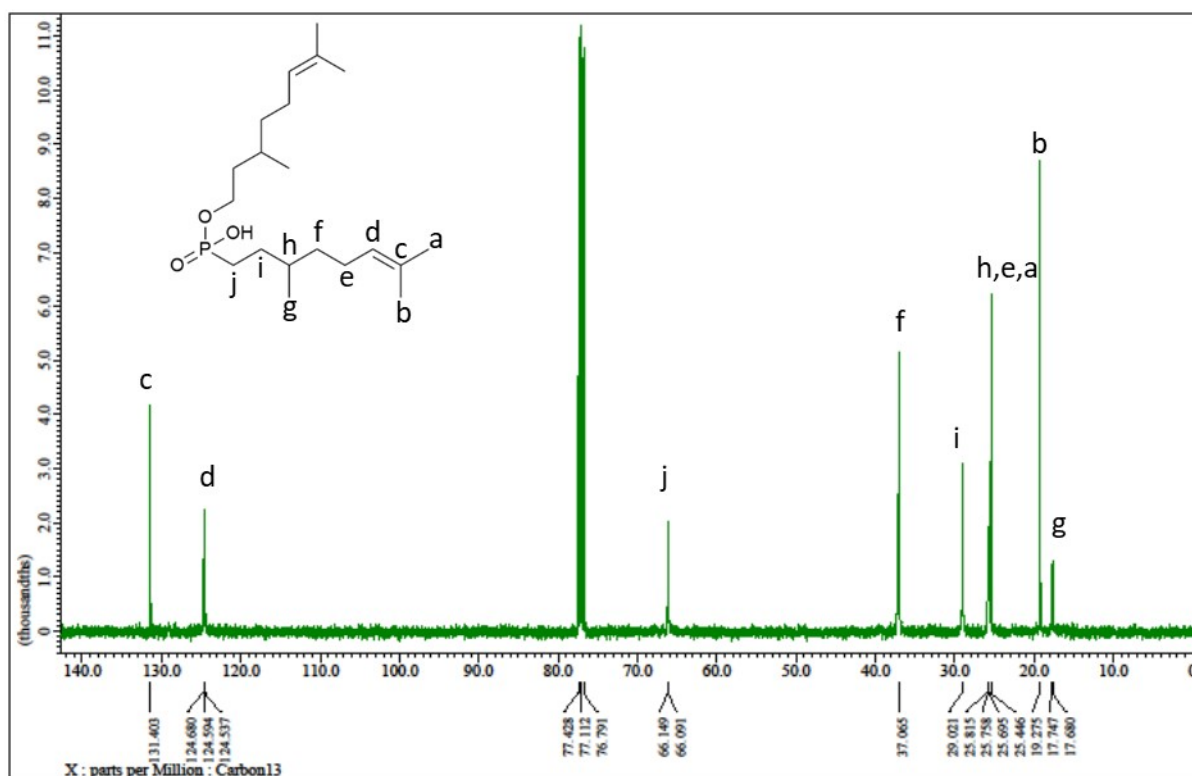

Figure S5:  $^{13}\text{C}$  NMR spectrum of CitrP

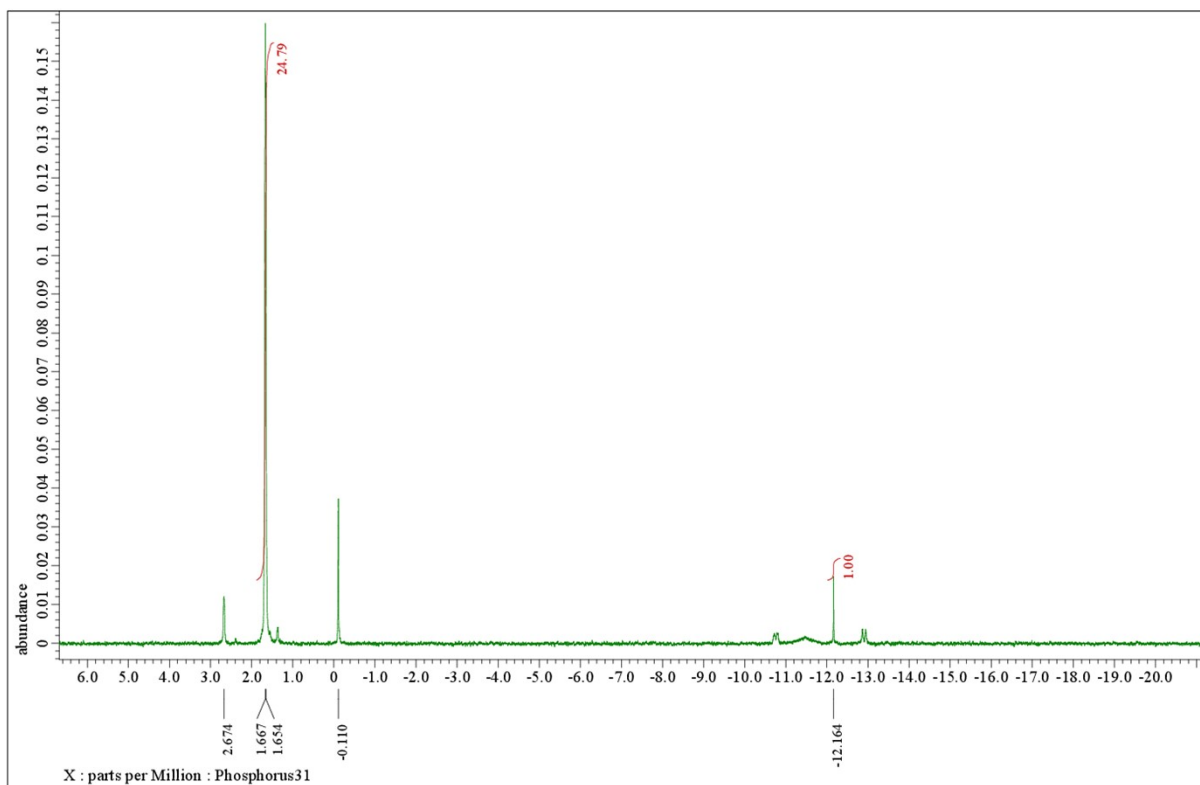

Figure S6:  $^{31}\text{P}$  NMR spectrum of CitrP

## 2. MS-Data of synthesized compounds

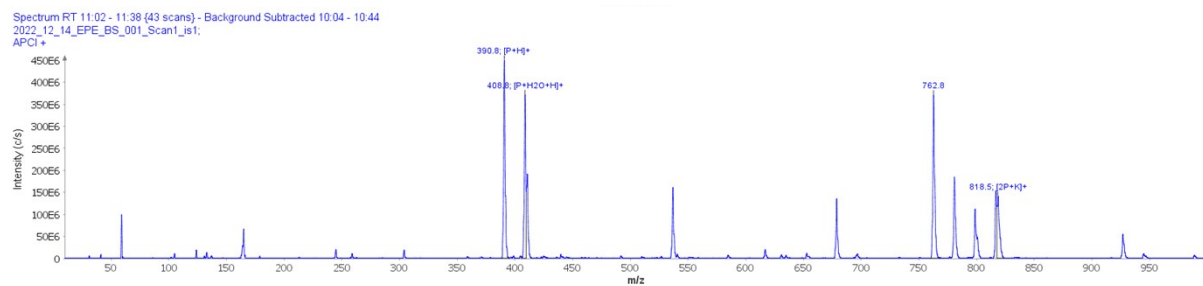

Figure S7: APCI MS spectrum (positive scan) of EUGP

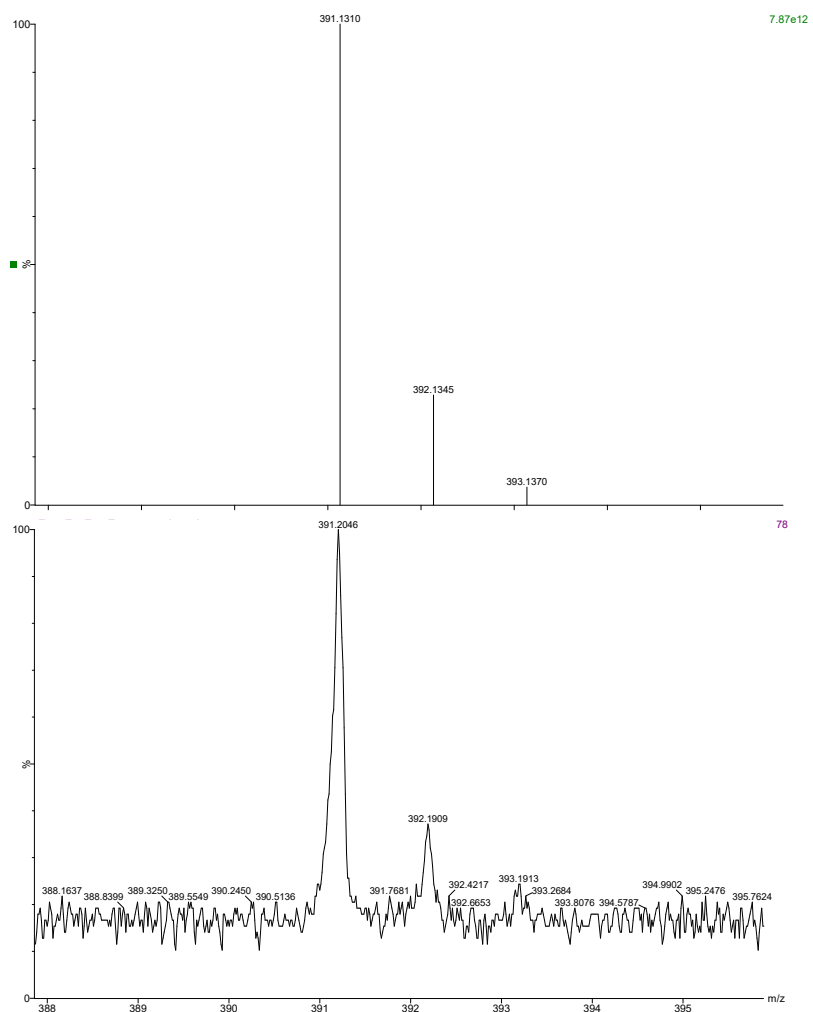

Figure S8: MALDI-MS spectrum of EUGP

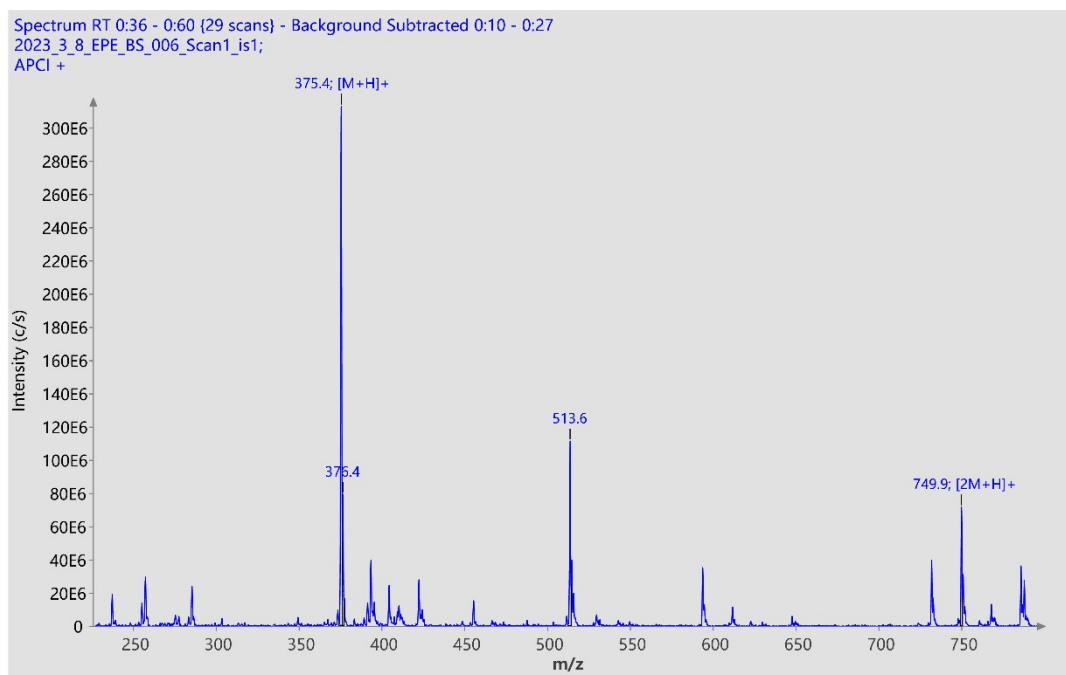

Figure S9: APCI MS spectrum (positive scan) of CitrP

### 3. FTIR-curing kinetics

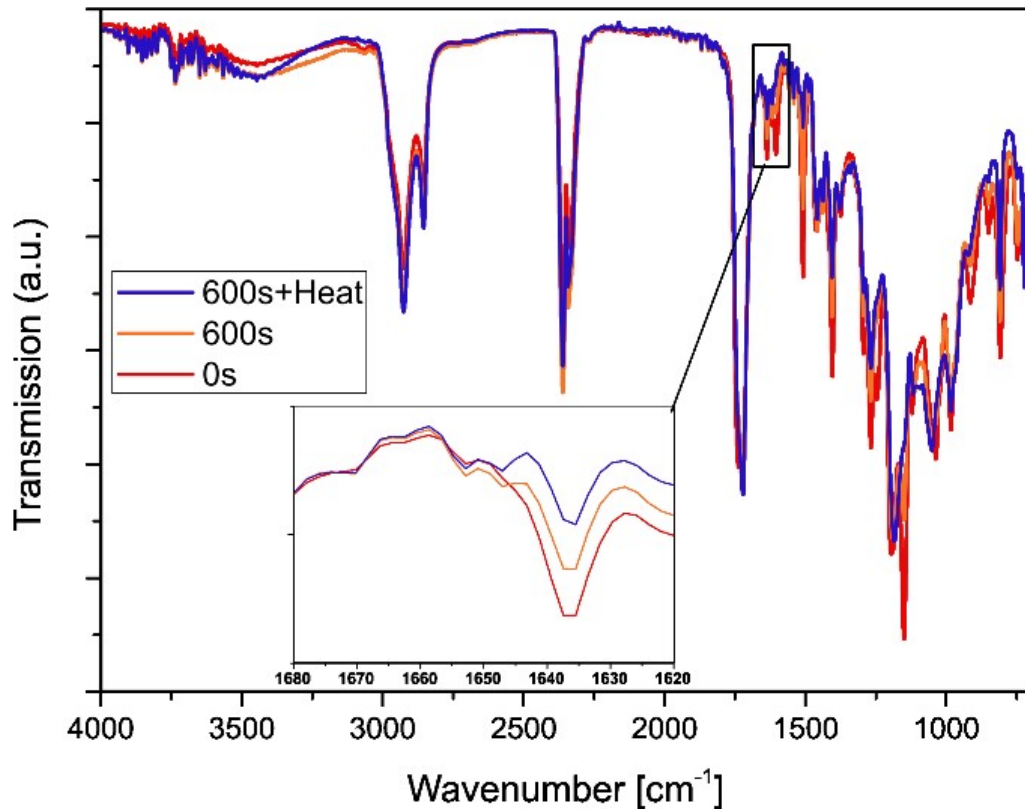

Figure S10: ATR FTIR spectra of uncured (0 s), cured (600 s under visible light) and thermally post treated (180 °C for 20 min) EUGP\_A50:E50 resin. The inset plot presents the zoom-in image of the C=C absorption band.

### 4. Resolution testing

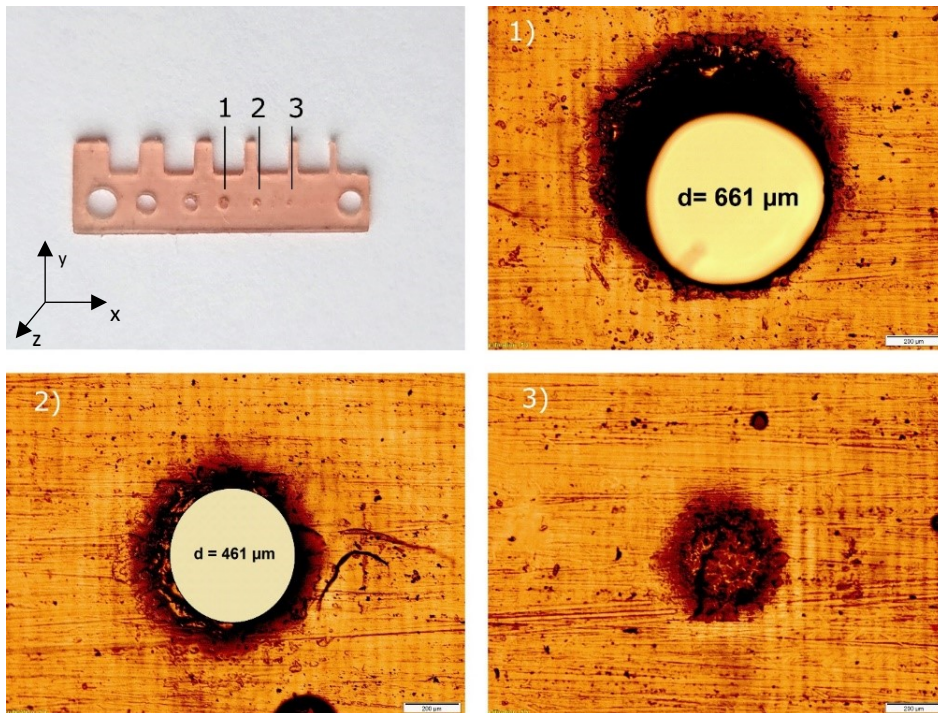

Figure S11: Testing the resolution of a DLP 3D-printed comb structure. (1-3) Optical micrographs of holes printed in different positions of the structure.

## 5. Spectra of the Light sources

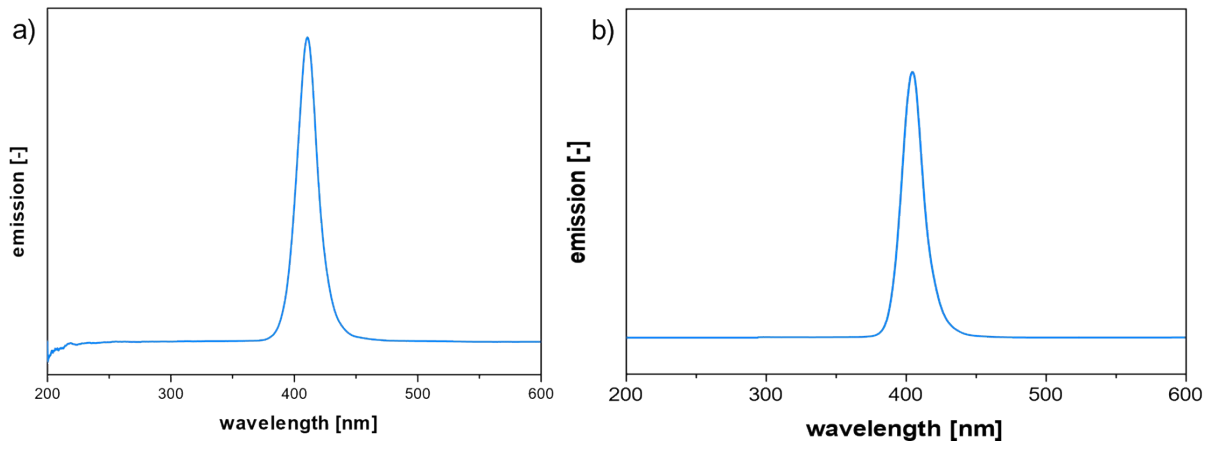

Figure S12: a) Emissionspectrum of the light source for IR-Measurements b) Emmisionspectrum of the 3D printer
